# Supplementary material for: Can autonomy support have an effect on type 2 diabetes glycemic control? Results of a cluster randomized controlled trial
Source: PubMed Central journal article supplement — BMJ Open Diabetes Res Care. 2020 Apr 16;8(1):e001018. doi: 10.1136/bmjdrc-2019-001018 (PMC7199146; doi:10.1136/bmjdrc-2019-001018), 2020-04-16
Supplement: bmjdrc-2019-001018supp001.pdf [file bmjdrc-2019-001018supp001.pdf]

## Supplementary Materials

Supplemental Table S1 the number of participants in each cluster

| CHC   | UCG | SSG | ASG |
|-------|-----|-----|-----|
| CHC 1 | 20  | 20  | 21  |
| CHC 2 | 20  | 20  | 20  |
| CHC 3 | 22  | 20  | 21  |
| CHC 4 | 20  | 20  | 23  |
| CHC 5 | 20  | 21  | 21  |
| CHC 6 | 18  | 18  | 19  |
| Total | 120 | 119 | 125 |

Supplemental Table S2. Interventions for patients in UCG, SSG and ASG.

| Groups | Contents      | Approaches                                                                                                                                                                                                                                                                                                                                                                                                                                                                                                                                                                                    |
|--------|---------------|-----------------------------------------------------------------------------------------------------------------------------------------------------------------------------------------------------------------------------------------------------------------------------------------------------------------------------------------------------------------------------------------------------------------------------------------------------------------------------------------------------------------------------------------------------------------------------------------------|
| UCG    | DSM education | Provision diabetes knowledges: <ul style="list-style-type: none"> <li>● Receiving health education on DSM from community doctor every 3 months;</li> <li>● Receiving a booklet about DSM knowledge.</li> </ul>                                                                                                                                                                                                                                                                                                                                                                                |
|        | DSM support   | None                                                                                                                                                                                                                                                                                                                                                                                                                                                                                                                                                                                          |
| SSG    | DSM education | Provision health knowledges and skills: <ul style="list-style-type: none"> <li>● Health education on DSM from community doctors in 8 intervention sessions;</li> <li>● A group behavior changes goal and action plan.</li> </ul>                                                                                                                                                                                                                                                                                                                                                              |
|        | DSM support   | Stressed on problem-solving: <ul style="list-style-type: none"> <li>● Sharing barriers in conducting action plan, a group discussion focusing on problem solving;</li> <li>● A handbook was given to family members on how to offer the support to diabetes.</li> </ul>                                                                                                                                                                                                                                                                                                                       |
| ASG    | DSM education | Provision health knowledge and skills, more stressed on autonomy and self-determined: <ul style="list-style-type: none"> <li>● Provision a clear reason why the behavior should be taken;</li> <li>● Offering an optional list for patient to conduct DSM behaviors self-evaluation;</li> <li>● Personalized goal and action plan was set based on patients' self-evaluation.</li> </ul>                                                                                                                                                                                                      |
|        | DSM support   | Offering supports base on patients' needs, foster patients' competence and relatedness: <ul style="list-style-type: none"> <li>● Based on action plan, patients were encouraged to found out what kind of supports were needed from their family;</li> <li>● When having obstacles in conducting the action plan, patients could put forward the solutions by themselves, or they could seek advices from peers;</li> <li>● The doctors, family members and peer leaders should minimize the pressure and acknowledge patients' feelings and perspectives while providing support.</li> </ul> |

Supplemental Table S3 Items for measuring DSM behaviors

| DSM behaviors | Items                                                                                                                                                                                                                                                                                                   |
|---------------|---------------------------------------------------------------------------------------------------------------------------------------------------------------------------------------------------------------------------------------------------------------------------------------------------------|
| Diet          | <ol style="list-style-type: none"> <li>1. In past 3 months, did you control the total amount of your daily diet according to the requirements of your doctor or dietitian?</li> <li>2. In past 3 months, did you eat low-fat diet according to the requirements of your doctor or dietitian?</li> </ol> |
| Exercise      | <ol style="list-style-type: none"> <li>1. In past 3 months, did you do moderate intensity exercises (e.g. jogging) for more than 30min a day and 5 days a week?</li> <li>2. Did you carry some snacks (e.g. candy) with during exercise in case of hypoglycemia?</li> </ol>                             |
| Medication    | Did you take the medicine or inject insulin according to your doctor's requirement?                                                                                                                                                                                                                     |
| Glucose       | <ol style="list-style-type: none"> <li>1. Did you monitor your blood glucose according to your doctor's requirement?</li> </ol>                                                                                                                                                                         |

monitoring 2. Did you test HbA<sub>1c</sub> every 3-6 months?

Options and scoring criteria: never = 0.2, rarely = 0.4, sometimes = 0.6, often = 0.8, always = 1.0.

Supplemental Table S4 Changes in clinical and DSM behavior outcomes over time

| Outcome                            | Baseline             | 3 months-baseline         | 6month-baseline          |
|------------------------------------|----------------------|---------------------------|--------------------------|
| <b>HbA<sub>1c</sub> (%)</b>        |                      |                           |                          |
| UCG                                | 7.28 (6.84, 7.72)    | -0.15 (-0.34, 0.41)       | -0.05 (-0.29, 0.19)      |
| SSG                                | 7.46 (6.94, 7.99)    | -0.21 (-0.38, -0.03) *    | -0.04 (-0.28, 0.20)      |
| ASG                                | 7.50 (7.17, 7.83)    | -0.71 (-0.93, -0.49) ***  | -0.52 (-0.77, -0.27) *** |
| SSG vs. UCG                        |                      | -0.05 (-0.33, 0.23)       | 0.01 (-0.34, 0.36)       |
| ASG vs. UCG                        |                      | -0.55 (-0.83, -0.28) ***  | -0.47 (-0.81, -0.13) **  |
| ASG vs. SSG                        |                      | -0.50 (-0.92, -0.08) *    | -0.48 (-0.90, -0.06) *   |
| <b>HbA<sub>1c</sub> (mmol/mol)</b> |                      |                           |                          |
| UCG                                | 56.11 (51.30, 60.97) | -1.66 (-3.76, 0.44)       | -0.58 (-3.21, 2.05)      |
| SSG                                | 58.07 (52.29, 63.85) | -2.24 (-4.13, -0.37) *    | -0.47 (-3.10, 2.15)      |
| ASG                                | 58.49 (54.88, 62.11) | -7.73 (-10.12, -5.31) *** | -5.71 (-8.44, -2.98) *** |
| SSG vs. UCG                        |                      | -0.59 (-3.65, 2.47)       | 0.11 (-3.68, 3.90)       |
| ASG vs. UCG                        |                      | -6.07 (-9.10, -3.04) ***  | -5.13 (-8.87, -1.38) **  |
| ASG vs. SSG                        |                      | -5.48 (-10.08, -0.88) *   | -5.24 (-9.83, -0.64) *   |
| <b>Diet</b>                        |                      |                           |                          |
| UCG                                | 1.39 (1.26, 1.53)    | 0.04 (-0.03, 0.11)        | 0.09 (0.02, 0.17) *      |
| SSG                                | 1.52 (1.36, 1.66)    | 0.03 (-0.04, 0.09)        | 0.06 (0.01, 0.13) *      |
| ASG                                | 1.49 (1.43, 1.56)    | 0.09 (0.02, 0.15) **      | 0.13 (0.05, 0.20) **     |
| SSG vs. UCG                        |                      | -0.02 (-0.11, 0.08)       | -0.03 (-0.13, 0.07)      |
| ASG vs. UCG                        |                      | 0.05 (-0.05, 0.14)        | 0.03 (-0.07, 0.13)       |
| ASG vs. SSG                        |                      | 0.06 (-0.06, 0.18)        | 0.07 (-0.05, 0.18)       |
| <b>Exercise</b>                    |                      |                           |                          |
| UCG                                | 1.45 (1.31, 1.59)    | -0.10 (-0.17, -0.05) **   | -0.05 (-0.13, 0.03)      |
| SSG                                | 1.31 (1.13, 1.49)    | 0.01 (-0.06, 0.08)        | -0.04 (-0.12, 0.04)      |
| ASG                                | 1.36 (1.21, 1.50)    | 0.11 (0.04, 0.18) **      | 0.16 (0.08, 0.23) ***    |
| SSG vs. UCG                        |                      | 0.11 (0.02, 0.21) *       | 0.01 (-0.10, 0.12)       |
| ASG vs. UCG                        |                      | 0.21 (0.12, 0.30) ***     | 0.20 (0.10, 0.31) ***    |
| ASG vs. SSG                        |                      | 0.10 (-0.04, 0.24) *      | 0.20 (0.06, 0.33) ***    |
| <b>Medication</b>                  |                      |                           |                          |
| UCG                                | 0.87 (0.80, 0.94)    | 0.00 (-0.03, 0.04)        | 0.00 (-0.04, 0.04)       |
| SSG                                | 0.86 (0.81, 0.90)    | -0.01 (-0.03, 0.02)       | -0.03 (-0.06, 0.00)      |
| ASG                                | 0.87 (0.81, 0.93)    | -0.01 (-0.04, 0.03)       | 0.02 (-0.02, 0.06)       |
| SSG vs. UCG                        |                      | -0.01 (-0.05, 0.03)       | -0.03 (-0.08, 0.02)      |
| ASG vs. UCG                        |                      | -0.01 (-0.05, 0.04)       | 0.02 (-0.03, 0.07)       |
| ASG vs. SSG                        |                      | 0.00 (-0.05, 0.05)        | 0.05 (-0.01, 0.10)       |
| <b>Glucose monitoring</b>          |                      |                           |                          |
| UCG                                | 1.39 (1.21, 1.56)    | 0.04 (-0.02, 0.11)        | 0.03 (-0.05, 0.10)       |
| SSG                                | 1.34 (1.14, 1.54)    | 0.08 (0.02, 0.13) **      | 0.04 (-0.03, 0.12)       |
| ASG                                | 1.30 (1.17, 1.42)    | 0.09 (0.02, 0.16) *       | 0.08 (0.00, 0.16)        |
| SSG vs. UCG                        |                      | 0.03 (-0.06, 0.13)        | 0.01 (-0.10, 0.12)       |
| ASG vs. UCG                        |                      | 0.05 (-0.04, 0.14)        | 0.06 (-0.06, 0.17)       |
| ASG vs. SSG                        |                      | 0.02 (-0.12, 0.15)        | 0.04 (-0.10, 0.18)       |

Data were estimated for means (95%CI). The data of within-group adjusted for baseline value, and the data of between-group were adjusted for baseline and basic characteristics.

\*  $P < 0.01$  , \*\*  $P < 0.05$  , \*\*\*  $P < 0.001$ .

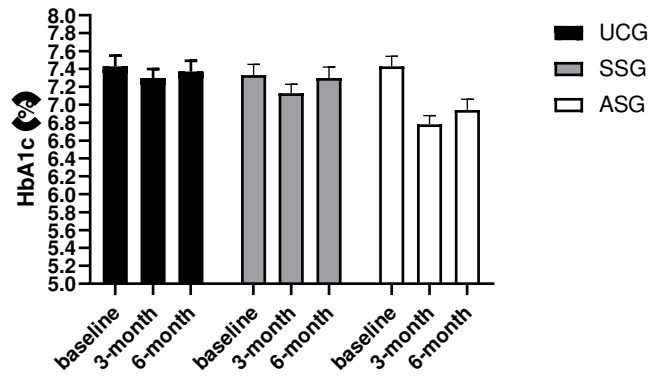

Supplemental Figure 1. The changes of HbA1c from baseline to 6 months.
